# Supplementary material for: Seismic Event Identification Based on a Generative Adversarial Network and Support Vector Machine
Source: Frontiers journal article supplement (doi:10.3389/feart.2022.814655), 2022-02-24
Supplement: Table_2.XLSX [file Table_2.XLSX]

## Sheet: The testing set
Seismic event information for the testing set
Origin Time (UTCtime)		Latitude(N)	Longitude(E)	Magnitude(MJMA)	Depth(km)	Number of records
2020-01-02	18:24:00	35.81	141.115	5.8	34	67
2020-01-03	05:30:00	35.505	136.678	3.3	7	3
2020-01-03	01:19:00	40.148	139.485	4.8	204	7
2020-01-04	04:35:00	36.18	140.023	3.1	52	14
2020-01-05	17:05:00	34.883	136.817	3.1	14	13
2020-01-05	19:20:00	36.748	140.575	3.4	10	8
2020-01-06	13:46:00	42.992	143.822	3.4	18	3
2020-01-07	19:22:00	36.143	139.822	3.9	51	2
2020-01-07	06:07:00	26.355	127.63	3.3	22	47
2020-01-08	02:57:00	37.152	141.993	4.7	41	5
2020-01-11	15:55:00	43.32	146.377	4.8	48	11
2020-01-13	19:53:00	36.077	139.883	4.8	46	123
2020-01-14	04:25:00	36.122	140.875	4.9	52	49
2020-01-14	23:18:00	36.432	140.687	3.7	52	18
2020-01-15	11:31:00	42.908	145.117	4.8	91	20
2020-01-16	00:01:00	35.88	137.577	3.1	6	6
2020-01-16	09:36:00	26.538	127.723	4.2	14	6
2020-01-16	17:39:00	33.695	135.477	3.4	23	5
2020-01-16	09:42:00	26.54	127.722	3.8	13	15
2020-01-17	17:53:00	38.903	142.098	4	44	13
2020-01-19	23:46:00	33.923	135.505	3.5	52	12
2020-01-20	08:04:00	28.258	129.962	3.4	21	1
2020-01-21	10:18:00	36.427	140.647	4.2	53	56
2020-01-22	10:38:00	37.03	141.317	3.5	49	4
2020-01-22	22:08:00	42.993	145.778	4	73	22
2020-01-22	09:52:00	33.902	134.465	3.1	3	10
2020-01-23	07:13:00	34.683	137.848	3.7	34	13
2020-01-25	01:34:00	35.267	140.643	4.1	58	7
2020-01-28	10:13:00	40.982	142.002	4.2	57	23
2020-01-28	01:36:00	43.373	145.983	5.5	96	10
2020-01-28	16:33:00	43.015	144.847	3.9	61	14
2020-01-28	03:23:00	39.165	142.567	4.1	29	11
2020-01-28	14:59:00	38.888	141.97	3.9	49	16
2020-01-28	23:39:00	27.332	126.532	5.7	14	1
2020-01-29	08:45:00	36.795	140.545	3.7	9	19
2020-01-30	02:54:00	33.022	130.553	3.6	9	16
2020-01-30	10:55:00	32.593	130.653	3.9	12	30
2020-01-31	16:11:00	35.673	140.712	5	50	6
2020-01-31	17:07:00	35.968	140.063	5.3	63	49
2020-01-31	11:29:00	37.385	141.348	3.6	34	139
2020-02-01	08:21:00	42.983	145.942	4.2	47	8
2020-02-02	13:46:00	32.375	130.68	3.4	12	2
2020-02-02	11:11:00	28.825	129.922	4.5	26	10
2020-02-05	01:00:00	43.227	146.095	4.4	45	5
2020-02-06	11:19:00	36.343	141.725	5.7	54	25
2020-02-06	23:41:00	36.988	140.662	3.7	73	29
2020-02-09	07:36:00	35.875	140.458	3.7	37	29
2020-02-10	21:11:00	35.578	139.42	3	25	11
2020-02-12	10:37:00	37.31	141.358	5.4	87	24
2020-02-12	10:36:00	42.7	141.975	4.2	41	89
2020-02-13	10:34:00	45.055	149.162	7.2	155	2
2020-02-13	03:55:00	27.58	129.15	4.1	29	34
2020-02-17	03:40:00	35.992	140.207	4.4	40	62
2020-02-18	19:15:00	32.685	130.6	3.5	11	15
2020-02-19	12:53:00	37.052	140.427	3.8	12	26
2020-02-19	15:50:00	43.307	143.945	4.6	5	17
2020-02-20	03:53:00	35.395	140.31	4.3	28	33
2020-02-21	22:38:00	40.355	142.082	3.7	50	8
2020-02-21	15:22:00	31.312	130.575	3.3	9	4
2020-02-23	21:19:00	41.597	140.757	3.3	11	10
2020-02-23	12:12:00	36.632	141.155	4.2	34	6
2020-02-25	03:12:00	36.177	140.005	3.3	51	16
2020-02-27	20:41:00	32.017	132.16	4	20	4
2020-03-02	23:16:00	33.613	130.382	3.5	17	3
2020-03-02	22:43:00	43.297	143.938	3.9	0	9
2020-03-02	18:28:00	34.212	135.125	3.2	7	17
2020-03-03	02:59:00	37.025	141.073	4.2	18	15
2020-03-03	09:31:00	30.398	131.097	4.4	32	2
2020-03-03	03:33:00	38.588	139.377	3.5	11	6
2020-03-04	07:25:00	35.772	141.032	3.8	37	6
2020-03-06	19:15:00	26.447	128.067	3.5	19	5
2020-03-07	11:56:00	35.96	140.303	4.1	58	17
2020-03-08	19:28:00	33.322	132.028	4.7	59	67
2020-03-11	04:04:00	39.677	140.738	4.4	12	6
2020-03-11	05:03:00	38.31	141.927	4	43	19
2020-03-11	02:26:00	35.9	137.628	3.3	9	19
2020-03-11	05:29:00	32.133	130.058	3.5	10	6
2020-03-12	17:18:00	37.278	136.823	5.5	12	38
2020-03-12	22:15:00	32.803	130.547	3.8	12	7
2020-03-12	17:36:00	37.285	136.825	3.6	12	4
2020-03-12	19:53:00	37.285	136.818	3.5	12	24
2020-03-13	08:33:00	34.667	131.975	3.8	11	25
2020-03-13	13:06:00	33.263	139.495	4.4	11	1
2020-03-15	10:09:00	36.123	140.077	3.8	64	3
2020-03-15	02:59:00	36.108	138.355	3.7	3	19
2020-03-15	00:53:00	36.108	138.352	3.1	1	40
2020-03-16	11:42:00	33.672	130.417	3.8	13	18
2020-03-17	12:38:00	37.132	141.247	3.9	61	16
2020-03-18	16:32:00	42.108	141.653	4	34	20
2020-03-18	00:44:00	35.298	133.13	3.5	12	20
2020-03-21	04:58:00	35.67	137.738	4.1	11	1
2020-03-21	03:37:00	41.55	142.07	3.8	65	35
2020-03-21	09:03:00	37.208	141.433	4.3	32	18
2020-03-22	11:52:00	34.045	135.127	3.1	6	2
2020-03-23	13:57:00	26.555	128.748	4.5	25	3
2020-03-24	03:15:00	32.14	131.458	3.4	19	8
2020-03-27	14:11:00	34.2	139.245	3.4	12	4
2020-03-28	00:58:00	41.922	142.353	5	70	49
2020-03-29	13:19:00	37.075	140.732	3.2	11	3
2020-03-29	03:39:00	24.177	124.207	5	10	6
2020-03-30	08:15:00	35.382	140.368	4.1	28	24
2020-03-30	15:52:00	23.852	123.367	5.5	31	2
2020-03-31	11:24:00	36.39	141.037	4.7	47	43
2020-04-01	15:33:00	35.695	140.913	4.2	13	15
2020-04-02	10:08:00	24.803	125.373	4.5	49	2
2020-04-03	05:30:00	34.452	133.368	4.1	12	39
2020-04-04	20:46:00	34.605	137.068	3.3	7	4
2020-04-04	21:57:00	31.267	129.973	4	9	1
2020-04-04	03:55:00	28.653	129.275	4.7	66	16
2020-04-05	20:00:00	37.267	136.812	4	12	20
2020-04-07	05:12:00	32.545	132.132	4.7	33	28
2020-04-07	17:53:00	31.697	129.558	4.3	10	19
2020-04-08	10:44:00	39.632	142.102	3.7	48	1
2020-04-08	15:28:00	40.35	142.183	3.7	45	15
2020-04-08	12:32:00	37.647	140.565	3.7	96	20
2020-04-08	05:55:00	26.663	126.663	4.5	102	4
2020-04-09	15:45:00	36.505	140.945	4.1	54	17
2020-04-09	03:12:00	36.402	141.03	3.8	46	25
2020-04-10	20:29:00	35.63	141.065	4.5	27	14
2020-04-10	10:22:00	41.933	142.307	4.4	72	8
2020-04-11	15:44:00	36.198	139.96	5	53	139
2020-04-12	13:11:00	41.727	141.977	4.3	44	24
2020-04-13	21:35:00	36.52	140.575	3.9	58	13
2020-04-13	10:16:00	36.767	137.878	4.2	5	32
2020-04-15	07:19:00	26.365	128.92	5.2	36	2
2020-04-16	04:15:00	35.8	140.977	3.7	27	34
2020-04-16	02:18:00	37.073	141.167	4.4	50	7
2020-04-16	21:22:00	26.022	128.695	5.3	34	3
2020-04-19	03:09:00	34.755	137.233	3.5	40	22
2020-04-19	20:39:00	38.887	142.098	6.2	46	99
2020-04-20	16:08:00	34.668	137.16	3.1	12	16
2020-04-20	01:49:00	38.843	142.113	4.3	44	12
2020-04-20	11:38:00	31.188	130.4	4.6	148	5
2020-04-21	17:26:00	36.227	137.66	3.8	4	12
2020-04-21	17:47:00	36.227	137.658	3.6	4	11
2020-04-23	04:44:00	36.225	137.662	5.5	3	26
2020-04-23	19:52:00	41.48	141.992	5.2	65	38
2020-04-23	16:38:00	35.872	140.493	4.2	37	49
2020-04-23	03:26:00	36.932	140.75	4.2	15	19
2020-04-23	01:22:00	37.112	141.105	3.8	52	28
2020-04-23	04:52:00	36.227	137.653	4.6	1	14
2020-04-23	04:57:00	36.235	137.65	5	5	6
2020-04-23	05:16:00	36.225	137.658	3.7	5	18
2020-04-23	10:10:00	36.217	137.61	3.2	5	4
2020-04-23	12:03:00	36.247	137.645	4.3	6	41
2020-04-23	21:31:00	36.227	137.615	3.3	3	27
2020-04-23	20:39:00	36.253	137.64	3	5	5
2020-04-23	12:36:00	42.763	143.155	3.4	101	4
2020-04-23	21:19:00	28.337	129.563	4.1	24	6
2020-04-24	10:57:00	36.243	137.638	3.4	5	6
2020-04-24	12:12:00	36.248	137.633	3.6	5	6
2020-04-25	17:22:00	36.252	137.637	5	6	39
2020-04-25	17:37:00	36.245	137.607	3.5	5	11
2020-04-25	23:56:00	36.25	137.632	3.5	5	5
2020-04-25	20:00:00	36.247	137.63	3.2	5	10
2020-04-26	00:49:00	36.132	140.08	4.8	66	114
2020-04-26	14:02:00	42.103	144.968	4.7	45	4
2020-04-27	02:32:00	36.248	137.63	4.8	10	23
2020-04-28	10:31:00	37.395	141.373	4.2	32	17
2020-04-29	09:25:00	39.637	142.108	3.7	49	8
2020-04-30	03:15:00	40.84	142.823	5.3	34	35
2020-04-30	05:44:00	36.263	137.637	3.1	4	4
2020-04-30	10:51:00	28.34	129.565	3.6	24	4
2020-05-03	11:54:00	31.303	128.717	6.2	9	4
2020-05-03	12:01:00	31.295	128.693	4.9	15	14
2020-05-03	09:17:00	33.293	129.905	3.2	5	3
2020-05-04	13:07:00	35.73	140.61	5.6	48	84
2020-05-04	13:34:00	36.347	141.03	4.4	45	45
2020-05-04	15:23:00	36.245	137.633	3.2	6	7
2020-05-05	16:57:00	35.632	140.078	5	68	117
2020-05-06	01:16:00	37.483	141.593	4.3	46	20
2020-05-08	21:35:00	40.102	142.023	4.8	11	25
2020-05-09	22:42:00	36.6	140.627	3.2	7	5
2020-05-10	23:58:00	36.387	141.038	5.8	47	37
2020-05-10	17:23:00	33.835	132.142	3.9	57	66
2020-05-12	22:04:00	36.26	137.627	4.6	2	13
2020-05-12	22:07:00	36.265	137.647	3.4	2	12
2020-05-12	22:31:00	36.262	137.63	3.4	4	6
2020-05-12	02:44:00	42.927	145.508	4.3	46	7
2020-05-13	19:30:00	40.103	142.022	4.6	12	16
2020-05-13	01:28:00	36.262	137.635	4.8	3	21
2020-05-13	06:15:00	36.265	137.63	3.7	4	7
2020-05-13	00:40:00	36.252	137.632	4.7	2	10
2020-05-13	13:46:00	42.873	145.057	4	75	15
2020-05-13	04:39:00	32.005	131.713	3.8	39	19
2020-05-14	21:40:00	38.702	142.255	4.6	39	23
2020-05-15	21:27:00	36.32	140.745	3.9	53	41
2020-05-16	19:00:00	30.177	130.452	3.1	5	2
2020-05-17	03:29:00	42.228	140.587	3.6	17	12
2020-05-17	11:38:00	33.608	134.753	4.6	37	53
2020-05-18	02:13:00	36.19	139.972	3.7	52	27
2020-05-18	03:00:00	38.175	141.695	5.2	51	50
2020-05-18	17:01:00	36.26	137.618	4.8	5	19
2020-05-18	20:00:00	36.263	137.628	4.1	5	2
2020-05-18	17:30:00	36.275	137.625	3	4	4
2020-05-18	20:10:00	36.277	137.63	3.1	4	10
2020-05-18	17:57:00	36.263	137.628	3.2	5	6
2020-05-19	04:13:00	36.283	137.628	5.4	3	63
2020-05-19	05:33:00	36.295	137.623	3.8	3	8
2020-05-19	07:05:00	36.288	137.628	4.4	3	41
2020-05-19	07:55:00	36.312	137.622	4.7	2	9
2020-05-19	03:17:00	37.513	141.425	5.4	50	11
2020-05-19	03:46:00	36.265	137.627	4	4	9
2020-05-19	05:27:00	36.288	137.627	3.6	4	15
2020-05-19	05:36:00	36.272	137.642	4	3	6
2020-05-19	07:15:00	36.295	137.59	3.4	3	35
2020-05-19	09:45:00	27.985	129.49	4.5	41	4
2020-05-20	17:07:00	35.537	139.97	3.5	17	36
2020-05-22	05:15:00	36.283	137.628	3.4	5	4
2020-05-22	04:52:00	36.277	137.632	3.2	5	8
2020-05-22	11:11:00	27.39	128.647	4.1	42	4
2020-05-22	19:33:00	27.295	128.435	4.9	48	6
2020-05-24	17:11:00	36.395	140.86	3.9	52	5
2020-05-24	03:10:00	43.757	143.995	3.2	11	3
2020-05-24	12:10:00	33.818	139.485	4.2	21	23
2020-05-25	19:38:00	30.343	130.948	4.2	12	3
2020-05-26	23:49:00	35.403	136.805	3	8	2
2020-05-27	09:19:00	24.85	125.408	5.2	51	2
2020-05-28	12:29:00	36.597	141.067	3.8	46	21
2020-05-28	17:46:00	38.617	141.897	3.8	48	11
2020-05-28	21:24:00	33.93	135.947	3.5	42	16
2020-05-29	00:46:00	35.387	140.395	3.6	52	20
2020-05-29	10:05:00	36.262	137.64	5.3	4	41
2020-05-29	10:46:00	36.238	137.643	3.7	5	13
2020-05-30	18:14:00	42.522	143.702	5.6	94	57
2020-05-31	21:02:00	36.19	140.343	5.2	97	5
2020-05-31	19:43:00	36.265	137.652	3.3	5	105
2020-06-01	00:33:00	31.58	130.337	4.3	9	28
2020-06-01	00:37:00	31.58	130.338	3.3	9	10
2020-06-02	06:41:00	35.62	140.047	3.5	8	21
2020-06-02	21:32:00	32.838	131.382	3.8	14	1
2020-06-02	09:37:00	27.85	128.815	3.4	44	16
2020-06-03	20:31:00	36.428	140.692	4.8	52	73
2020-06-06	13:48:00	35.567	139.678	3.6	79	47
2020-06-07	12:44:00	36.005	141.237	4.2	26	13
2020-06-07	15:17:00	36.195	139.955	3.5	53	31
2020-06-08	09:36:00	31.58	130.34	3.2	8	6
2020-06-09	15:22:00	33.317	133.363	4.7	21	7
2020-06-09	04:43:00	35.425	133.833	3.3	13	40
2020-06-11	19:36:00	36.332	138.01	3.8	7	6
2020-06-11	17:09:00	43.113	146.042	4.2	65	16
2020-06-12	11:30:00	32.625	132.178	4.2	40	26
2020-06-12	17:42:00	38.418	141.943	4.2	61	3
2020-06-12	13:03:00	28.652	129.387	4.3	54	21
2020-06-13	15:51:00	28.8	128.3	6.3	160	23
2020-06-13	20:18:00	24.202	122.428	5.5	52	1
2020-06-15	23:27:00	35.048	139.923	4.1	54	28
2020-06-15	16:55:00	37.825	141.645	4.5	82	17
2020-06-15	22:28:00	36.398	140.675	3.7	52	56
2020-06-16	06:36:00	43.142	146.055	3.9	79	6
2020-06-17	06:03:00	35.31	136.467	4.4	6	34
2020-06-18	04:01:00	37.873	140.877	3.3	78	6
2020-06-18	22:25:00	24.81	125.387	4.4	50	1
2020-06-18	16:43:00	25.002	123.368	5.7	14	2
2020-06-19	18:03:00	36.24	137.645	3.9	4	1
2020-06-19	05:45:00	39.102	142.197	3.9	43	11
2020-06-19	17:38:00	39.328	141.975	3.7	44	11
2020-06-19	00:26:00	24.948	123.398	5.6	18	17
2020-06-22	13:29:00	24.342	122.967	4.4	49	1
2020-06-23	20:26:00	36.048	137.523	3.4	7	8
2020-06-24	19:47:00	35.5	141.2	6.2	30	127
2020-06-25	00:05:00	37.045	139.393	3	8	6
2020-06-25	17:00:00	23.97	123.578	4.6	35	2
2020-06-28	05:59:00	35.65	140.707	3.8	50	10
2020-06-29	15:06:00	43.142	146.015	3.7	49	2
2020-06-29	02:37:00	24.83	125.402	4.3	47	7
